# Supplementary material for: Latitudinal Dynamics of Vibrio along the Eastern Coastline of Australia
Source: MDPI journal article supplement (doi:10.3390/w14162510), 2022-08-15
Supplement: s1 [file s1]

## Supplementary Material

**Table S1.** List of locations sampled, detailing date, latitude, longitude, sample type and Koppen-Classification.

| Location         | Date     | Latitude     | Longitude     | Type  | Koppen-classification |
|------------------|----------|--------------|---------------|-------|-----------------------|
| Darwin B         | 17/1/18  | 12°22'42.8"S | 130°50'30.8"E | Beach | Tropical              |
| Darwin R         | 3/2/18   | 12°27'06.3"S | 130°49'12.0"E | River | Tropical              |
| Cooktown B       | 3/2/18   | 15°27'33.3"S | 145°15'00.9"E | Beach | Tropical              |
| Cooktown R       | 3/2/18   | 15°27'37.8"S | 145°14'57.6"E | River | Tropical              |
| Cairns B         | 15/1/18  | 16°55'03.9"S | 145°46'50.2"E | Beach | Tropical              |
| Cairns R         | 17/1/18  | 16°56'28.1"S | 145°46'33.3"E | River | Tropical              |
| Townsville B     | 18/1/18  | 19°14'39.5"S | 146°48'39.6"E | Beach | Tropical              |
| Townsville R     | 3/2/18   | 19°16'29.3"S | 146°49'52.0"E | River | Tropical              |
| Mackay B         | 16/2/18  | 21°06'37.6"S | 149°13'33.4"E | Beach | Subtropical           |
| Mackay R         | 16/2/18  | 21°08'29.3"S | 149°11'53.4"E | River | Subtropical           |
| Rockhampton B1   | 1/3/18   | 23°15'17.8"S | 150°49'44.5"E | Beach | Subtropical           |
| Rockhampton B2   | 11/1/18  | 23°16'01.7"S | 150°49'42.2"E | Beach | Subtropical           |
| Bundaberg R1     | 16/1/18  | 24°45'41.8"S | 152°23'14.6"E | River | Subtropical           |
| Bundaberg R2     | 16/1/18  | 24°51'53.9"S | 152°20'37.1"E | River | Subtropical           |
| Gold Coast B     | 1/3/18   | 28°09'45.0"S | 153°31'09.5"E | Beach | Subtropical           |
| Gold Coast R     | 26/12/17 | 28°10'44.1"S | 153°32'30.1"E | River | Subtropical           |
| Coffs Harbour R  | 1/2/18   | 30°17'46.9"S | 153°08'12.7"E | River | Subtropical           |
| Coffs Harbour B  | 1/2/18   | 30°18'17.4"S | 153°08'34.9"E | Beach | Subtropical           |
| Port Macquarie B | 1/2/18   | 31°25'39.5"S | 152°55'03.1"E | Beach | Subtropical           |
| Port Macquarie R | 18/1/18  | 31°25'40.3"S | 152°54'28.6"E | River | Subtropical           |
| Sydney R         | 1/2/18   | 33°83'97" S  | 151°25'24" E  | River | Subtropical           |
| Sydney B         | 18/1/18  | 33°91'00" S  | 151°25'91" E  | Beach | Subtropical           |
| Jervis Bay B     | 17/1/18  | 35°00'46.0"S | 150°41'38.5"E | Beach | Temperate             |
| Jervis Bay R     | 15/1/18  | 35°01'13.8"S | 150°40'19.9"E | River | Temperate             |
| Marimbula R      | 17/1/18  | 36°53'29.1"S | 149°54'40.6"E | River | Temperate             |
| Marimbula B      | 18/1/18  | 36°53'52.4"S | 149°54'53.9"E | Beach | Temperate             |
| Hobart B         | 1/2/18   | 42°51'05.7"S | 147°31'16.2"E | Beach | Temperate             |
| Hobart R         | 1/2/18   | 42°53'20.9"S | 147°20'17.6"E | River | Temperate             |

**Table S2.** Primers used in study.

| Host Organism                  | Target Gene | Primer Sequences                                                                                                                               | qPCR Conditions                                               | Efficiency | Quantification limit            | Ref                       |
|--------------------------------|-------------|------------------------------------------------------------------------------------------------------------------------------------------------|---------------------------------------------------------------|------------|---------------------------------|---------------------------|
| All Bacteria                   | 16S rRNA    | Forward: 5' CGGTGAATACGTTTCYCGG 3'<br>Reverse: 5' AAGGAGGTGATCCRGCCGCA 3'<br>Probe: 5' CTTGTACACACCGCCCGTC 3'                                  | 95°C for 3 min; 40 cycles of: 95°C for 30 sec, 56°C for 1 min | 99.4 %     | 10 <sup>2</sup> copies/reaction | (Suzuki et al. 2000)      |
| All <i>Vibrio</i>              | 16S rRNA    | Forward: 5' GGCGTAAAGCGCATGCAGGT 3'<br>Reverse: 5' GAAATTCTACCCCCCTCTACAG 3'                                                                   | 95°C for 3 min; 40 cycles of: 95°C for 15 sec, 60°C for 1 min | 100.6%     | 10 <sup>1</sup> copies/reaction | (Thompson et al. 2004a)   |
| <i>Vibrio cholerae</i>         | <i>ompW</i> | Forward: 5' AACATCCGTGGATTTGGCATCTG 3'<br>Reverse: 5' GCTGGTTCCTCAACGCTTCTG 3'                                                                 | 95°C for 3 min; 40 cycles of: 95°C for 15 sec, 60°C for 1 min | 96.7%      | 10 <sup>1</sup> copies/reaction | (Gubala & Proll 2006)     |
| <i>Vibrio cholerae</i>         | <i>ctxA</i> | Forward: 5' TTTGTTAGGCACGATGATGGAT 3'<br>Reverse: 5' ACCAGACAATATAGTTTGACCCACTAAG 3'<br>Probe: 5' FAM - TGTTCACCTCAATTAGTTTGAGAAGTGCCC - TAMRA | 94°C for 2 min; 45 cycles of: 94°C for 10s, 63°C for 30s      | 97%        | 10 <sup>1</sup> copies/reaction | (Blackstone et al., 2007) |
| <i>Vibrio vulnificus</i>       | <i>vohA</i> | Forward: 5' AACATCCGTGGATTTGGCATCTG 3'<br>Reverse: 5' GCTGGTTCCTCAACGCTTCTG 3'                                                                 | 95°C for 3 min; 40 cycles of: 95°C for 15 sec, 56°C for 1 min | 98.5%      | 10 <sup>1</sup> copies/reaction | (Siboni et al. 2016)      |
| <i>Vibrio parahaemolyticus</i> | <i>tdhS</i> | Forward: 5' GTAAAGGTCTCTGACTTTTGGAC 3'<br>Reverse: 5' TGGAATATGAACCTTCATCTTCACC 3'                                                             | 95°C for 3 min; 40 cycles of: 95°C for 15 sec, 50°C for 1 min | 102%       | 10 <sup>2</sup> copies/reaction | (Rizvi & Bej 2010)        |
